# Supplementary material
Source: MDPI journal article supplement (https://www.mdpi.com/2072-4292/10/11/1680)
Supplement: s1 [file s1]

# Supplementary materials: Evaluation of spectral indices for assessing fire severity in Australian temperate forests

Bang Nguyen Tran, Mihai A. Tanase, Lauren T. Bennett and Cristina Aponte

**Table S1.** Numbers of reference plots for fire severity analysis by forest type

| Forest type                         | Total area within fire boundary | Number of plots by wildfire severity class* |            |             |             | Total plots by forest type |
|-------------------------------------|---------------------------------|---------------------------------------------|------------|-------------|-------------|----------------------------|
|                                     |                                 | Unburnt                                     | Low        | Moderate    | High        |                            |
| Grassy / heathy Dry Forest          | 59,822                          | 37                                          | 32         | 238         | 162         | 469                        |
| Tall Mixed Forest                   | 1,515                           | 21                                          | 21         | 25          | 26          | 93                         |
| Foothills Forest                    | 9,401                           | 22                                          | 27         | 48          | 30          | 127                        |
| Forby Forest                        | 95,934                          | 60                                          | 34         | 205         | 96          | 395                        |
| Moist Forest (S)                    | 36,309                          | 29                                          | 28         | 40          | 52          | 149                        |
| Moist Forest (R)                    | 106,084                         | 41                                          | 72         | 448         | 126         | 687                        |
| Riparian (higher rainfall)          | 12,127                          | 24                                          | 24         | 26          | 34          | 108                        |
| Tall Mist Forest                    | 69,828                          | 68                                          | 27         | 64          | 25          | 184                        |
| Closed-forest                       | 8,243                           | 22                                          | 24         | 23          | 27          | 96                         |
| high Altitude Shrubland / Woodland  | 22,899                          | 30                                          | 23         | 110         | 158         | 321                        |
| Inland Plains Woodland              | 10,116                          | 25                                          | 23         | 33          | 27          | 108                        |
| Riverine Woodland / Forest          | 28,788                          | 60                                          | 132        | 459         | 211         | 862                        |
| lowan Mallee                        | 5,220                           | 31                                          | 27         | 27          | 29          | 114                        |
| Broombush Whipstick                 | 2,557                           | 30                                          | 28         | 29          | 26          | 113                        |
| <b>Total plots by fire severity</b> |                                 | <b>500</b>                                  | <b>522</b> | <b>1775</b> | <b>1029</b> | <b>3826</b>                |

\* Fire severity classification was adopted from Department of Environment, Water, Land and Planning of Victoria (DEWLP), Melbourne, Victoria. Unburnt: no crown scorch severity with less than 1% of eucalypt and non-eucalypt crowns are scorched; Low severity: light crown scorch with 1 - 35% of eucalypt crowns are scorched; Moderate severity: moderate crown scorch with 30 - 65% of eucalypt crowns are scorched; High severity: crown burn with 70 - 100% of eucalypt crowns are burnt.

**Table S2.** Landsat 5 TM images used to compute spectral indices of the reference plots (bands used: 3÷7)

| Fire season | Path | Row | Fire start date | Days before the fire | Days after the fire |
|-------------|------|-----|-----------------|----------------------|---------------------|
| 1998        | 091  | 86  | 10 Jan 1998     | 48                   | 32                  |
| 2006        | 092  | 86  | 24 Feb 2006     | 96                   | 80                  |
| 2006        | 093  | 86  | 16 Feb 2006     | 17                   | 64                  |
| 2006        | 094  | 86  | 07 Feb 2006     | 16                   | 32                  |
| 2007        | 095  | 85  | 29 Nov 2006     | 48                   | 48                  |
| 2007        | 095  | 86  | 21 Nov 2006     | 40                   | 56                  |
| 2009        | 091  | 86  | 16 Feb 2009     | 23                   | 41                  |
| 2009        | 092  | 86  | 16 Feb 2009     | 16                   | 64                  |

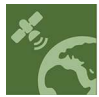

**Table S3.** A summary of scores for all ten spectral indices from three methods of evaluation by forest type. Higher values in all cases indicates greater capacity to discriminate between fire-severity classes (i.e. a total score of 3 indicates strong discrimination by all three evaluation methods).

| Forest name                | Forest Group | Evaluation Methods  | Scores by index |             |             |             |             |             |             |             |             |             |
|----------------------------|--------------|---------------------|-----------------|-------------|-------------|-------------|-------------|-------------|-------------|-------------|-------------|-------------|
|                            |              |                     | dND VI          | dNB R       | dND WI      | dNB RT      | dND VIT     | dVI6 T      | dba I       | dMS AVI     | dMI RBI     | dCSI        |
| Grassy / heathy Dry Forest | OF-R         | ANOVA               | 0.75            | 1           | 1           | 1           | 1           | 1           | 0           | 0.75        | 0           | 1           |
|                            |              | M analysis          | 0               | 1           | 0.75        | 1           | 0.75        | 0           | 0           | 0           | 0           | 0           |
|                            |              | Optimality analysis | 0               | 0.75        | 0.75        | 0.75        | 0           | 0           | 0           | 0           | 0           | 0.75        |
|                            |              | <b>Total</b>        | <b>0.75</b>     | <b>2.75</b> | <b>2.5</b>  | <b>2.75</b> | <b>1.75</b> | <b>1</b>    | <b>0</b>    | <b>0.75</b> | <b>0</b>    | <b>1.75</b> |
| Tall Mixed Forest          | OF-R         | ANOVA               | 0.75            | 0.75        | 0.75        | 0           | 0.75        | 0.75        | 0           | 0.75        | 0           | 0           |
|                            |              | M analysis          | 0               | 0           | 0           | 0           | 0           | 0           | 0           | 0           | 0           | 0           |
|                            |              | Optimality analysis | 0               | 0           | 0           | 0           | 0           | 0           | 0           | 0           | 0           | 0           |
|                            |              | <b>Total</b>        | <b>0.75</b>     | <b>0.75</b> | <b>0.75</b> | <b>0</b>    | <b>0.75</b> | <b>0.75</b> | <b>0</b>    | <b>0.75</b> | <b>0</b>    | <b>0</b>    |
| Foothills Forest           | OF-R         | ANOVA               | 1               | 1           | 1           | 1           | 1           | 1           | 0.75        | 1           | 0.75        | 1           |
|                            |              | M analysis          | 0               | 0.75        | 0.75        | 0.75        | 0.75        | 0.75        | 0           | 0           | 0           | 0           |
|                            |              | Optimality analysis | 0               | 0.75        | 0.75        | 0.75        | 0           | 0.75        | 0           | 0           | 0           | 0.75        |
|                            |              | <b>Total</b>        | <b>1</b>        | <b>2.5</b>  | <b>2.5</b>  | <b>2.5</b>  | <b>1.75</b> | <b>2.5</b>  | <b>0.75</b> | <b>1</b>    | <b>0.75</b> | <b>1.75</b> |
| Forby Forest               | OF-R         | ANOVA               | 0.75            | 0.75        | 1           | 0.75        | 0.75        | 0.75        | 0           | 0.75        | 0           | 0.75        |
|                            |              | M analysis          | 0.75            | 1           | 1           | 0.75        | 0           | 0.75        | 0           | 0.75        | 0           | 0           |
|                            |              | Optimality analysis | 0               | 0.75        | 0           | 0           | 0           | 0           | 0           | 0           | 0           | 0           |
|                            |              | <b>Total</b>        | <b>1.5</b>      | <b>2.5</b>  | <b>2</b>    | <b>1.5</b>  | <b>0.75</b> | <b>1.5</b>  | <b>0</b>    | <b>1.5</b>  | <b>0</b>    | <b>0.75</b> |
| Moist Forest               | OF-R         | ANOVA               | 0.75            | 0.75        | 1           | 0.75        | 0.75        | 0.75        | 0.75        | 0.75        | 1           | 1           |
|                            |              | M analysis          | 0               | 1           | 0.75        | 0.75        | 0           | 0.75        | 0           | 0           | 0.75        | 0           |
|                            |              | Optimality analysis | 0               | 0.75        | 0           | 0           | 0           | 0           | 0           | 0           | 0           | 0           |
|                            |              | <b>Total</b>        | <b>0.75</b>     | <b>2.5</b>  | <b>1.75</b> | <b>1.5</b>  | <b>0.75</b> | <b>1.5</b>  | <b>0.75</b> | <b>0.75</b> | <b>1.75</b> | <b>1</b>    |
| Moist Forest               | CF-S         | ANOVA               | 1               | 0.75        | 0.75        | 0.75        | 1           | 1           | 0.75        | 1           | 0           | 0           |
|                            |              | M analysis          | 1               | 1           | 1           | 1           | 1           | 1           | 1           | 1           | 0           | 0.75        |
|                            |              | Optimality analysis | 0               | 0.75        | 1           | 0.75        | 0           | 0           | 0           | 0           | 0           | 1           |
|                            |              | <b>Total</b>        | <b>2</b>        | <b>2.5</b>  | <b>2.75</b> | <b>2.5</b>  | <b>2</b>    | <b>2</b>    | <b>1.75</b> | <b>2</b>    | <b>0</b>    | <b>1.75</b> |
| Riparian (higher rainfall) | OF-RS        | ANOVA               | 0.75            | 0           | 0           | 0           | 0.75        | 0.75        | 0           | 0.75        | 0           | 0           |
|                            |              | M analysis          | 1               | 0.75        | 0           | 1           | 0.75        | 0           | 0           | 0.75        | 0           | 0           |
|                            |              | Optimality analysis | 0               | 0           | 0.75        | 0           | 0           | 0           | 0           | 0           | 0           | 0.75        |
|                            |              | <b>Total</b>        | <b>1.75</b>     | <b>0.75</b> | <b>0.75</b> | <b>1</b>    | <b>1.5</b>  | <b>0.75</b> | <b>0</b>    | <b>1.5</b>  | <b>0</b>    | <b>0.75</b> |
| Tall Mist Forest           | CF-S         | ANOVA               | 0               | 0           | 0.75        | 0.75        | 0           | 0.75        | 0.75        | 0.75        | 0           | 0           |
|                            |              | M analysis          | 0.75            | 0           | 0.75        | 0           | 0           | 0           | 0           | 0.75        | 0           | 0.75        |
|                            |              | Optimality analysis | 0               | 0           | 0           | 0           | 0           | 0           | 0           | 0           | 0           | 0           |
|                            |              | <b>Total</b>        | <b>0.75</b>     | <b>0</b>    | <b>1.5</b>  | <b>0.75</b> | <b>0</b>    | <b>0.75</b> | <b>0.75</b> | <b>1.5</b>  | <b>0</b>    | <b>0.75</b> |
| Closed-forest              | CF-R         | ANOVA               | 0               | 0           | 0           | 0           | 0           | 0           | 0           | 0           | 0           | 0           |
|                            |              | M analysis          | 0               | 0           | 0           | 0           | 0           | 0           | 0           | 0           | 0           | 0           |
|                            |              | Optimality analysis | 0               | 0           | 0           | 0           | 0           | 0           | 0           | 0           | 0           | 0           |
|                            |              | <b>Total</b>        | <b>0</b>        | <b>0</b>    | <b>0</b>    | <b>0</b>    | <b>0</b>    | <b>0</b>    | <b>0</b>    | <b>0</b>    | <b>0</b>    | <b>0</b>    |

|                                             |      |                        |             |             |             |             |             |             |             |             |             |             |
|---------------------------------------------|------|------------------------|-------------|-------------|-------------|-------------|-------------|-------------|-------------|-------------|-------------|-------------|
| high<br>Altitude<br>Shrubland /<br>Woodland | W-R  | ANOVA                  | 1           | 1           | 1           | 1           | 1           | 1           | 0           | 1           | 0           | 1           |
|                                             |      | M analysis             | 0.75        | 1           | 0.75        | 1           | 0.75        | 0.75        | 0.75        | 0.75        | 0           | 0           |
|                                             |      | Optimality<br>analysis | 0           | 1           | 1           | 0           | 0           | 0.75        | 0           | 0           | 0           | 1           |
|                                             |      | <b>Total</b>           | <b>1.75</b> | <b>3</b>    | <b>2.75</b> | <b>2</b>    | <b>1.75</b> | <b>2.5</b>  | <b>0.75</b> | <b>1.75</b> | <b>0</b>    | <b>2</b>    |
| Inland<br>Plains<br>Woodland                | W-R  | ANOVA                  | 0.75        | 0.75        | 0.75        | 0.75        | 0.75        | 0.75        | 0           | 0.75        | 0.75        | 0.75        |
|                                             |      | M analysis             | 0.75        | 0           | 0           | 0           | 0.75        | 0           | 0           | 0.75        | 0           | 0           |
|                                             |      | Optimality<br>analysis | 0           | 0           | 0           | 0           | 0           | 0           | 0           | 0           | 0           | 0           |
|                                             |      | <b>Total</b>           | <b>1.5</b>  | <b>0.75</b> | <b>0.75</b> | <b>0.75</b> | <b>1.5</b>  | <b>0.75</b> | <b>0</b>    | <b>1.5</b>  | <b>0.75</b> | <b>0.75</b> |
| Riverine<br>Woodland /<br>Forest            | W-R  | ANOVA                  | 1           | 1           | 1           | 1           | 1           | 0.75        | 0           | 1           | 1           | 1           |
|                                             |      | M analysis             | 0           | 0.75        | 0           | 0.75        | 0           | 0           | 0           | 0           | 0           | 0           |
|                                             |      | Optimality<br>analysis | 0           | 0.75        | 0.75        | 0           | 0           | 0           | 0           | 0           | 0           | 0.75        |
|                                             |      | <b>Total</b>           | <b>1</b>    | <b>2.5</b>  | <b>1.75</b> | <b>1.75</b> | <b>1</b>    | <b>0.75</b> | <b>0</b>    | <b>1</b>    | <b>1</b>    | <b>1.75</b> |
| lowan<br>Mallee                             | LW-R | ANOVA                  | 0.75        | 0.75        | 0           | 0.75        | 0.75        | 0           | 0           | 0.75        | 0.75        | 0           |
|                                             |      | M analysis             | 0           | 0           | 0           | 0           | 0.75        | 0           | 0           | 0           | 0.75        | 0           |
|                                             |      | Optimality<br>analysis | 0           | 0           | 0           | 0           | 0           | 0           | 0           | 0           | 0           | 0           |
|                                             |      | <b>Total</b>           | <b>0.75</b> | <b>0.75</b> | <b>0</b>    | <b>0.75</b> | <b>1.5</b>  | <b>0</b>    | <b>0</b>    | <b>0.75</b> | <b>1.5</b>  | <b>0</b>    |
| Broombush<br>Whipstick                      | LW-R | ANOVA                  | 0           | 1           | 0.75        | 1           | 0           | 0           | 0           | 0           | 1           | 0.75        |
|                                             |      | M analysis             | 0           | 0           | 0           | 0.75        | 0           | 0           | 0           | 0           | 0           | 0           |
|                                             |      | Optimality<br>analysis | 0           | 0           | 0           | 0           | 0           | 0           | 0           | 0           | 0           | 0           |
|                                             |      | <b>Total</b>           | <b>0</b>    | <b>1</b>    | <b>0.75</b> | <b>1.75</b> | <b>0</b>    | <b>0</b>    | <b>0</b>    | <b>0</b>    | <b>1</b>    | <b>0.75</b> |

**Table S4.** Thresholds for selected spectral indices for fire severity assessment by forest groups or type

| Forest group                         | Spectral index | Thresholds* |        |        |
|--------------------------------------|----------------|-------------|--------|--------|
|                                      |                | U to L      | L to M | M to H |
| OF-R                                 | dNBR           | 0.040       | 0.215  | 0.545  |
| OF-R                                 | dNDWI          | 0.033       | 0.185  | 0.395  |
| W-R                                  | dNBR           | 0.083       | 0.260  | 0.540  |
| W-R                                  | dNDWI          | 0.050       | 0.190  | 0.375  |
| W-R (Inland Plains Woodland)         | dNDVI          | -0.050      | 0.035  | 0.263  |
| W-R (Inland Plains Woodland)         | dNDVIT         | -0.020      | 0.065  | 0.305  |
| W-R (Inland Plains Woodland)         | dMSAVI         | -0.070      | 0.045  | 0.310  |
| LW-R                                 | dNBR           | 0.063       | 0.160  | 0.360  |
| LW-R                                 | dNBRT          | 0.100       | 0.225  | 0.475  |
| OF-RS                                | dNDVI          | -0.098      | 0.160  | 0.340  |
| OF-RS                                | dNDVIT         | -0.055      | 0.128  | 0.320  |
| OF-RS                                | dMSAVI         | -0.080      | 0.158  | 0.358  |
| CF-S                                 | dNDWI          | -0.003      | 0.203  | 0.438  |
| OF-R + W-R                           | dNBR           | 0.050       | 0.230  | 0.550  |
| OF-R + W-R                           | dNDWI          | 0.035       | 0.180  | 0.385  |
| OF-RS + W-R (Inland Plains Woodland) | dNDVI          | -0.073      | 0.128  | 0.328  |
| OF-RS + W-R (Inland Plains Woodland) | dNDVIT         | -0.043      | 0.128  | 0.330  |
| OF-RS + W-R (Inland Plains Woodland) | dMSAVI         | -0.075      | 0.125  | 0.333  |

\* U, L, M and H stand for unburnt, low, moderate and high severity classes; values indicate the index value at the transition between two fire-severity classes (e.g. values below the 'U to L' threshold are classified as Unburnt, and those above are classified as Low-severity up to the L to M threshold etc).

**Table S5.** Thresholds by forest type for selected spectral indices of the transition from Unburnt and Low (UL) to Moderate and High (MH) fire severity.

| Forest group                 | Spectral indices | Thresholds* |
|------------------------------|------------------|-------------|
| OF-R                         | dNBR             | 0.230       |
| OF-R                         | dNDWI            | 0.190       |
| W-R                          | dNBR             | 0.273       |
| W-R                          | dNDWI            | 0.203       |
| W-R (Inland Plains Woodland) | dNDVI            | 0.125       |
| W-R (Inland Plains Woodland) | dNDVIT           | 0.160       |
| W-R (Inland Plains Woodland) | dMSAVI           | 0.140       |
| LW-R                         | dNBR             | 0.218       |
| LW-R                         | dNBRT            | 0.300       |
| OF-RS                        | dNDVI            | 0.153       |
| OF-RS                        | dNDVIT           | 0.108       |
| OF-RS                        | dMSAVI           | 0.150       |
| CF-S                         | dNDWI            | 0.230       |

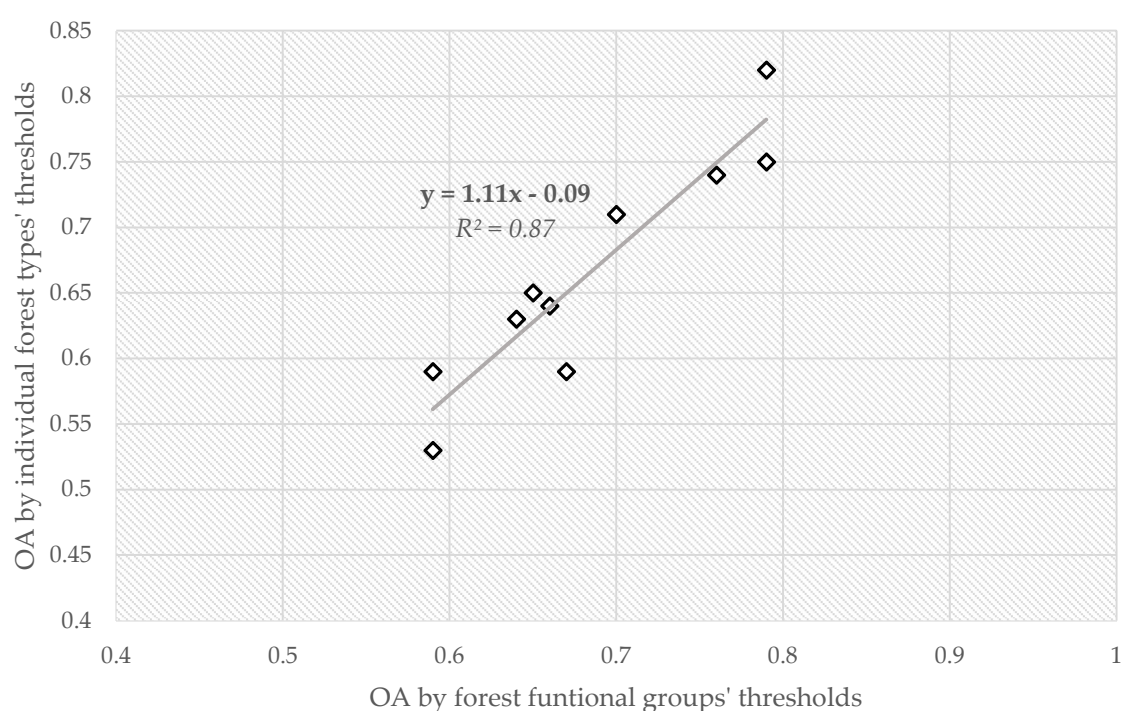**Figure S1.** Scatterplot between overall accuracies (OA) estimated using defined thresholds in the best-performing index by forest type (i.e. mean of multiple forest types per group) and by forest functional group types per group, indicating similar levels of accuracy at the two levels of forest classification. Each point represents for each best performing index in each forest type.

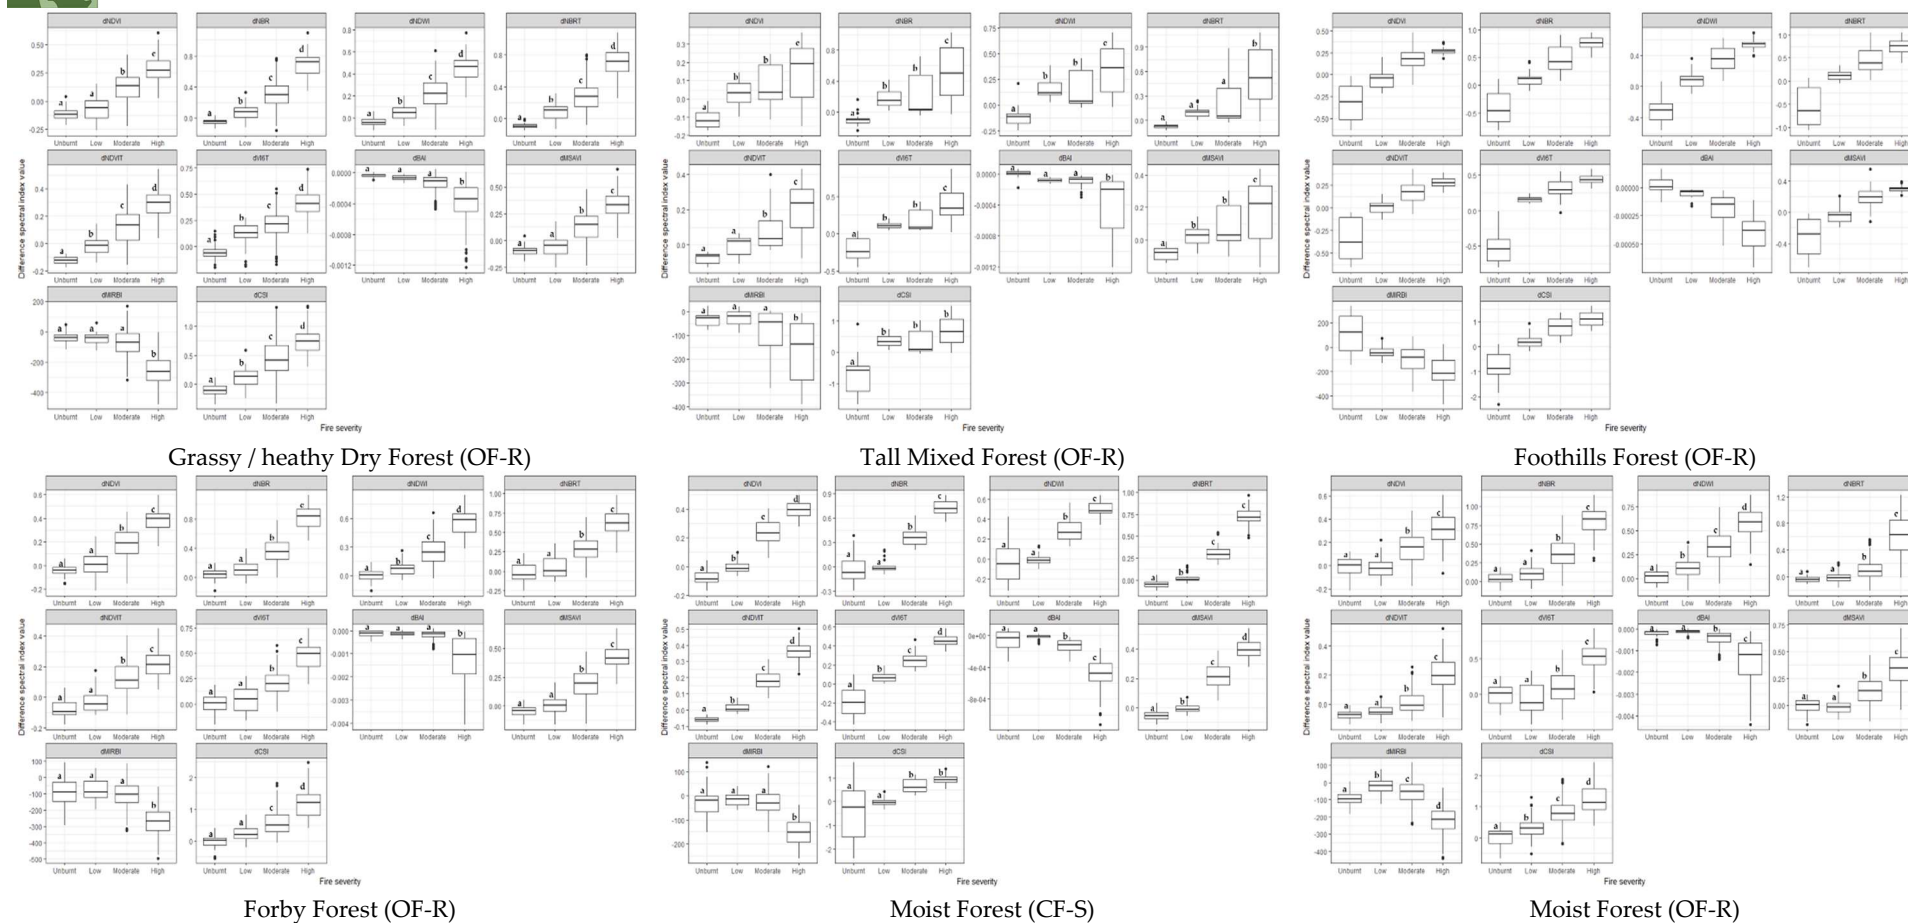

**Figure S2.** Boxplots of 10 difference indices between pre- and post-fire spectral indices derived from Landsat satellite images at four different fire severity classes (unburnt, low, moderate and high severity) for all individual forest types. (Means that do not share a letter are statistically significant different).

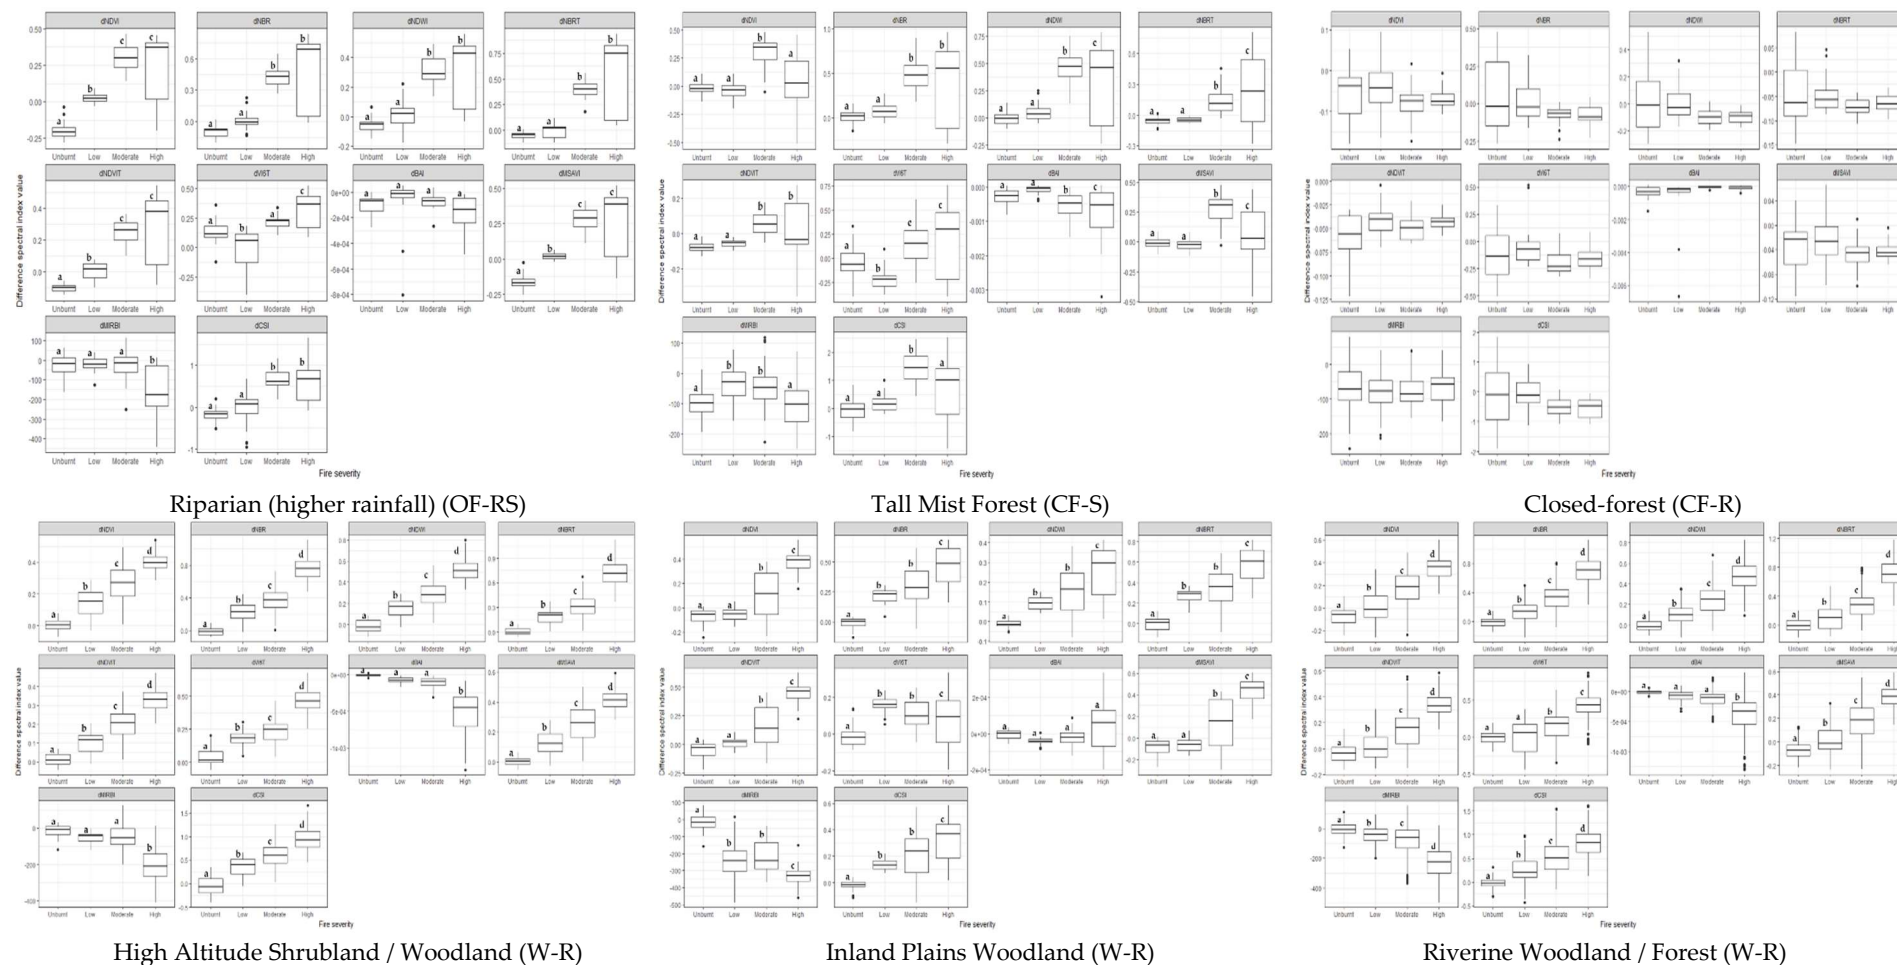

**Figure S2.** (Continued) Boxplots of 10 difference indices between pre- and post-fire spectral indices derived from Landsat satellite images at four different fire severity classes (unburnt, low, moderate and high severity) for all individual forest types. (Means that do not share a letter are statistically significant different).

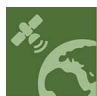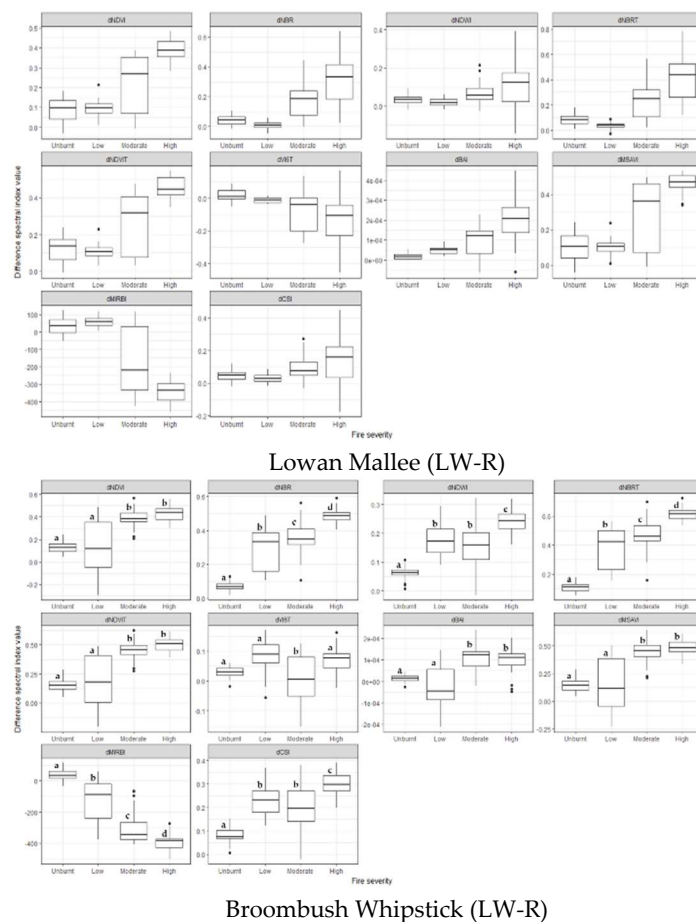

**Figure S2.** (Continued) Boxplots of 10 difference indices between pre- and post-fire spectral indices derived from Landsat satellite images at four different fire severity classes (unburnt, low, moderate and high severity) for all individual forest types. (Means that do not share a letter are statistically significant different).

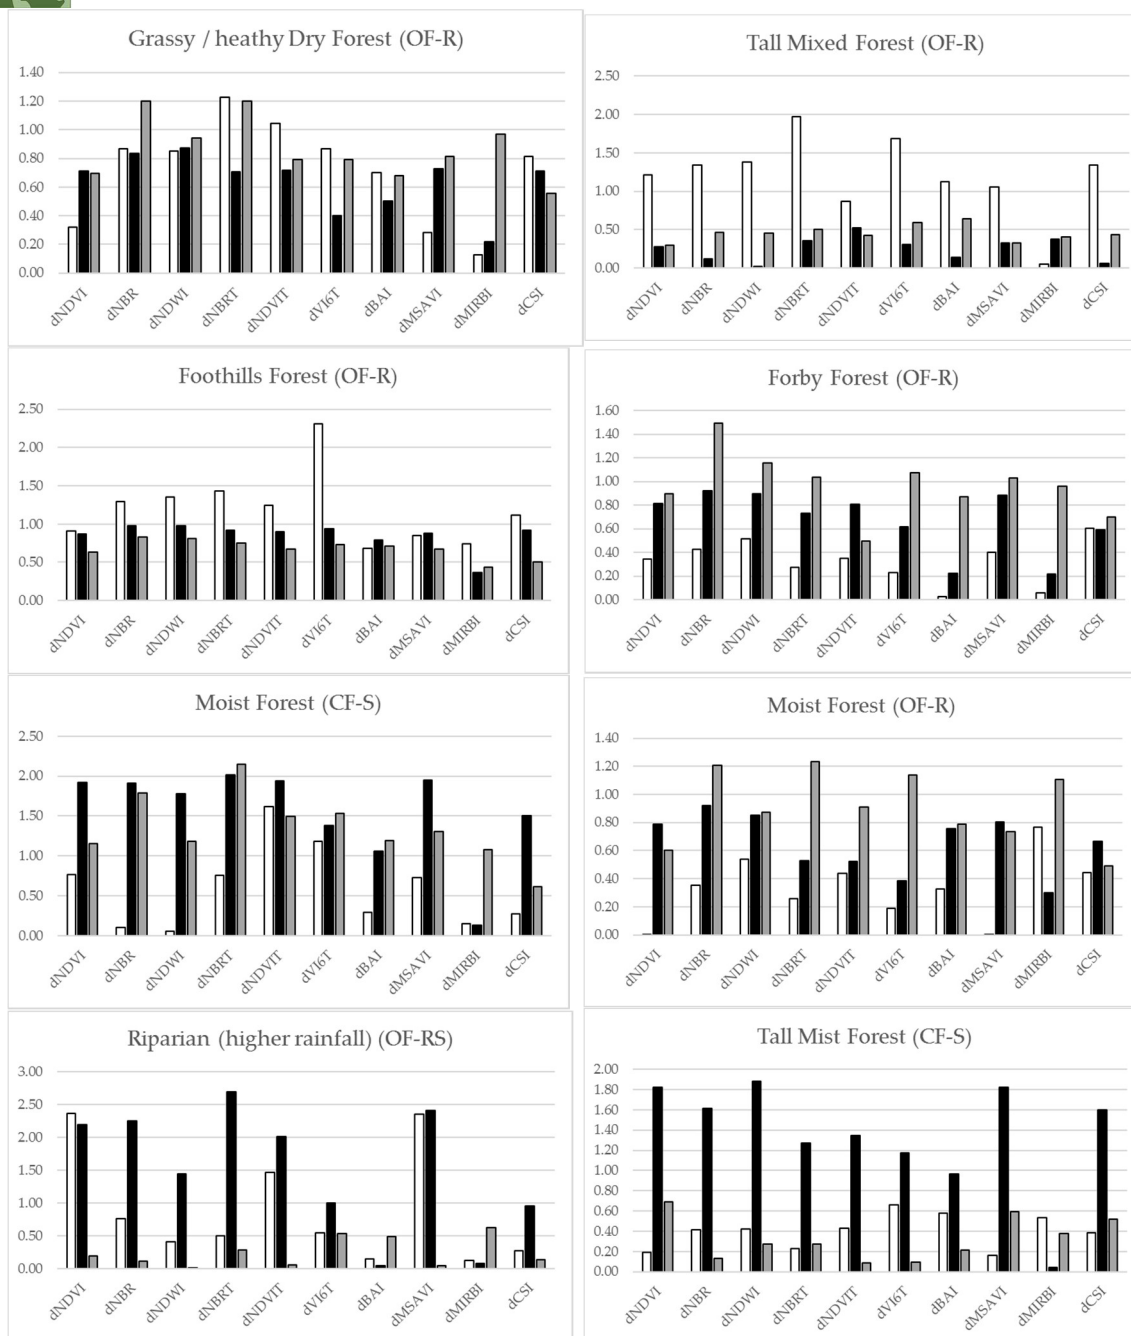

**Figure S3.** M values indicating the capacity of 10 spectral indices to distinguish between fire-severity classes for resprouter (R), obligate seeder (S) and mixed traits (RS) forest types; the higher the value of M, the better the discrimination between two classes.



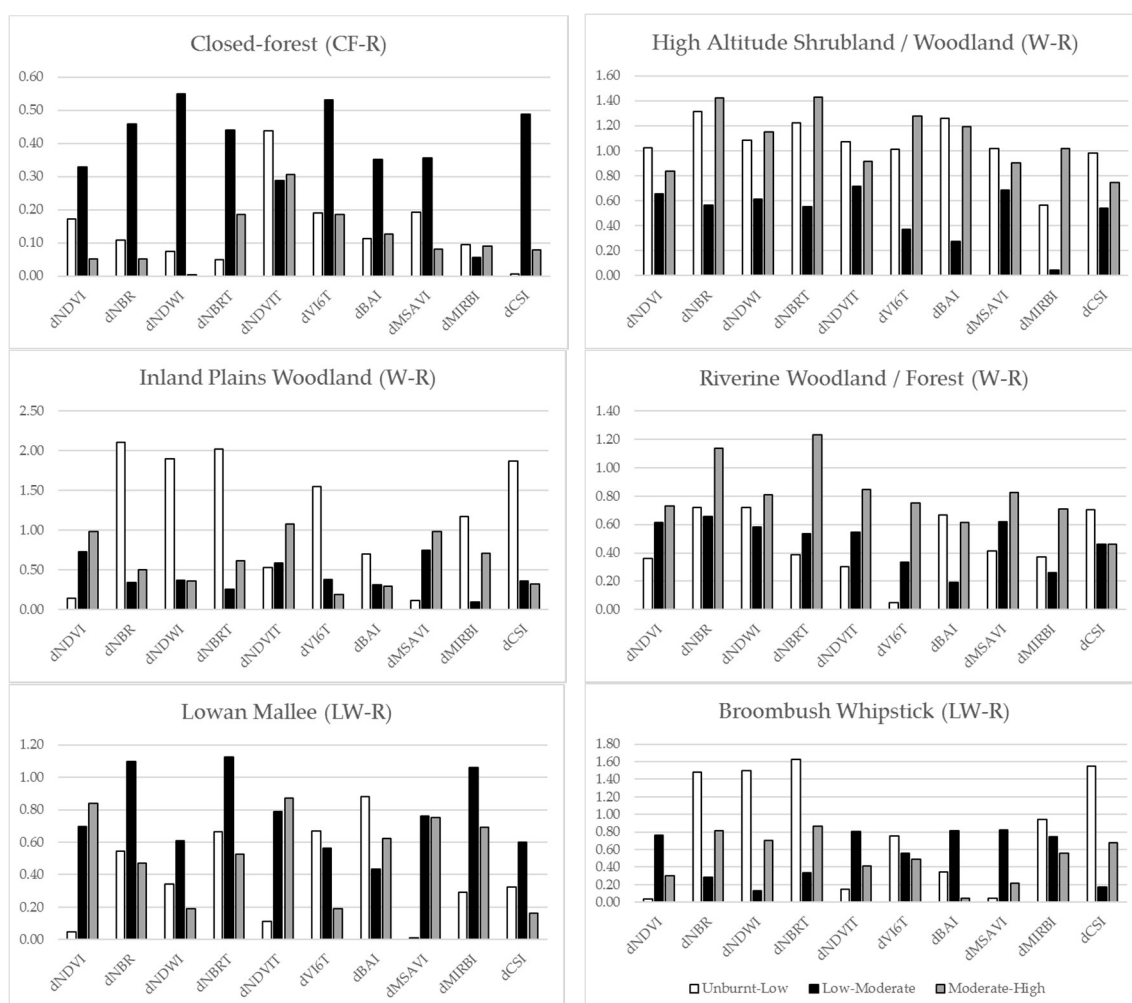

**Figure S3.** (Continued) M values indicating the capacity of 10 spectral indices to distinguish between fire-severity classes for resprouter (R), obligate seeder (S) and mixed traits (RS) forest types; the higher the value of M, the better the discrimination between two classes.

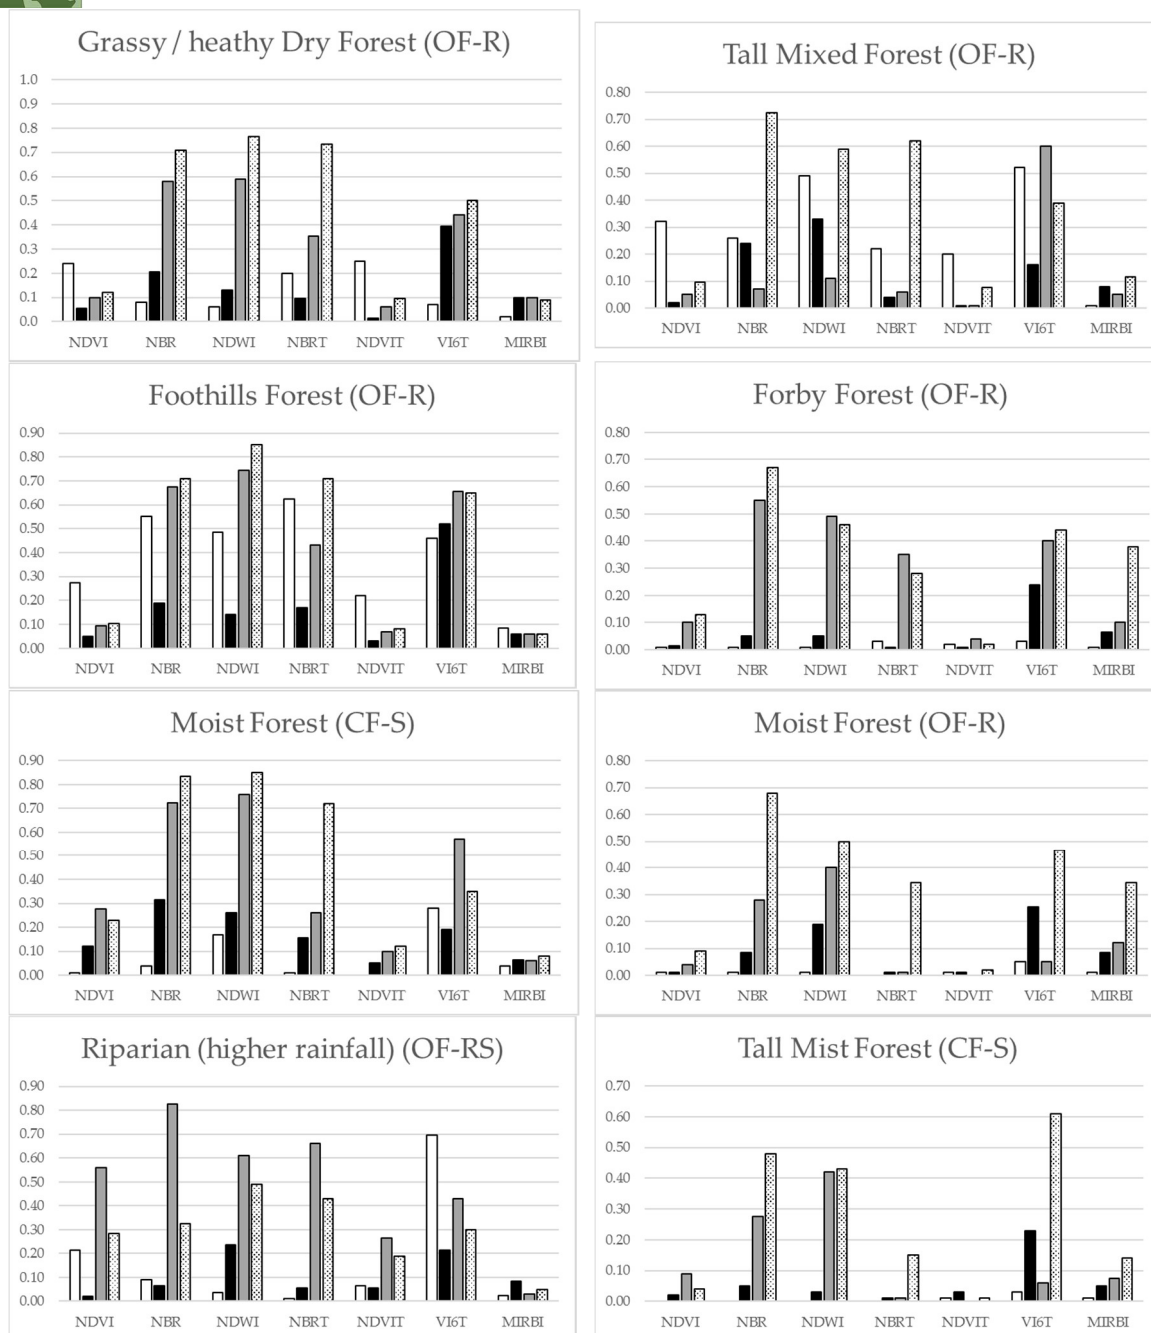

**Figure S4.** Bar charts for median values of spectral indices' optimality derived from Landsat satellite images at four different classes: unburnt to low, moderate and high severity) for the resprouter (R), obligate seeder (S) and mixed traits (RS) forest ecosystems. Optimality values for NDVI, BAI and MSAVI are equal; Optimality values for NDWI and CSI are also equal due to the same input bands for calculating these optimality values.

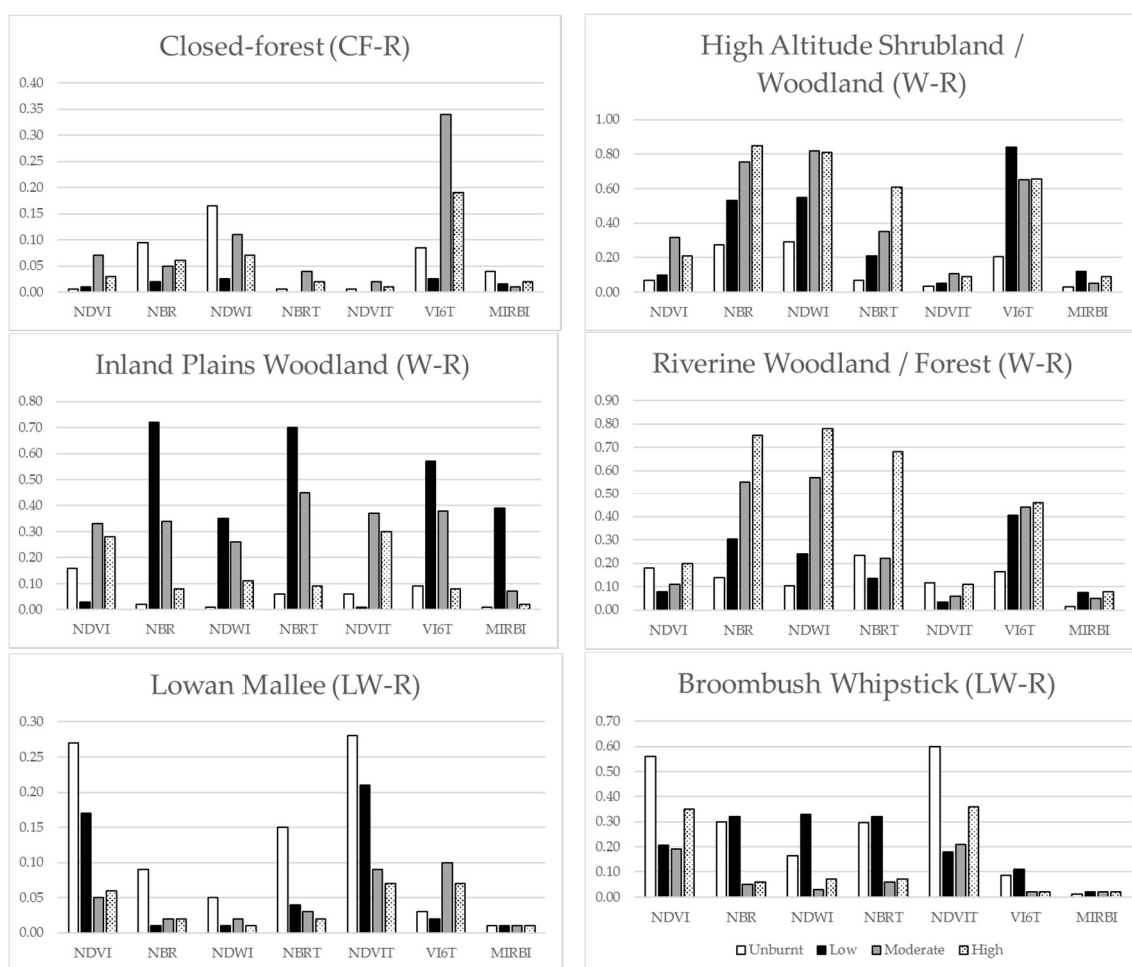

**Figure S4.** (Continued) Bar charts for median values of spectral indices' optimality derived from Landsat satellite images at four different classes: unburnt to low, moderate and high severity) for the resprouter (R), obligate seeder (S) and mixed traits (RS) forest ecosystems. Optimality values for NDVI, BAI and MSAVI are equal; Optimality values for NDWI and CSI are also equal due to the same input bands for calculating these optimality values.

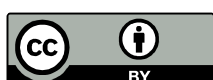

© 2018 by the authors. Licensee MDPI, Basel, Switzerland. This article is an open access article distributed under the terms and conditions of the Creative Commons Attribution (CC BY) license (<http://creativecommons.org/licenses/by/4.0/>).
